# Supplementary material for: Food-induced dopamine signaling in AgRP neurons promotes feeding
Source: PubMed Central journal article supplement — Cell Rep. Author manuscript; Available in PMC 2022 Dec 15. (PMC9753708; doi:10.1016/j.celrep.2022.111718), 2022-11-29
Supplement: NIHMS1854081-supplement-1.pdf [file NIHMS1854081-supplement-1.pdf]

**Cell Reports, Volume 41**

**Supplemental information**

**Food-induced dopamine signaling in**

**AgRP neurons promotes feeding**

**Qi Zhang, Qijun Tang, Nidhi M. Purohit, Julia B. Davenport, Charles Brennan, Rahul K. Patel, Elizabeth Godschall, Larry S. Zwiemel, Anthony Spano, John N. Campbell, and Ali D. Güler**

Figure S1. The genetic profile of ARC neurons, Related to Figure 1

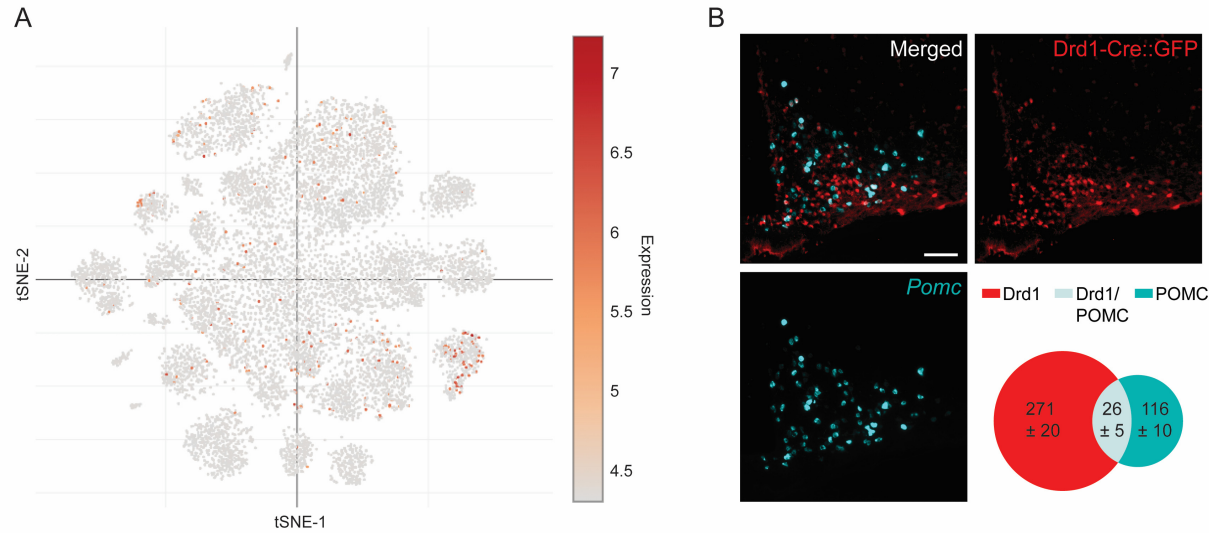

(A) A t-Distributed Stochastic Neighbor Embedding (t-SNE) plot showing the expression level of *Drd1* in the molecular census of the hypothalamic ARC-ME complex. (B) Representative images showing the ARC of *Drd1-Cre::GFP* mice. Scale bar represents 100  $\mu$ m. Venn diagram indicates the average number of cells expressing only the *Drd1-Cre::GFP* (red), only *Pomc* (cyan), and both *Drd1-Cre::GFP* and *Pomc* (light cyan). n = 3.

# Figure S2. ARC<sup>Drd1</sup> neurons regulate feeding and energy homeostasis, Related to Figures 2 - 4

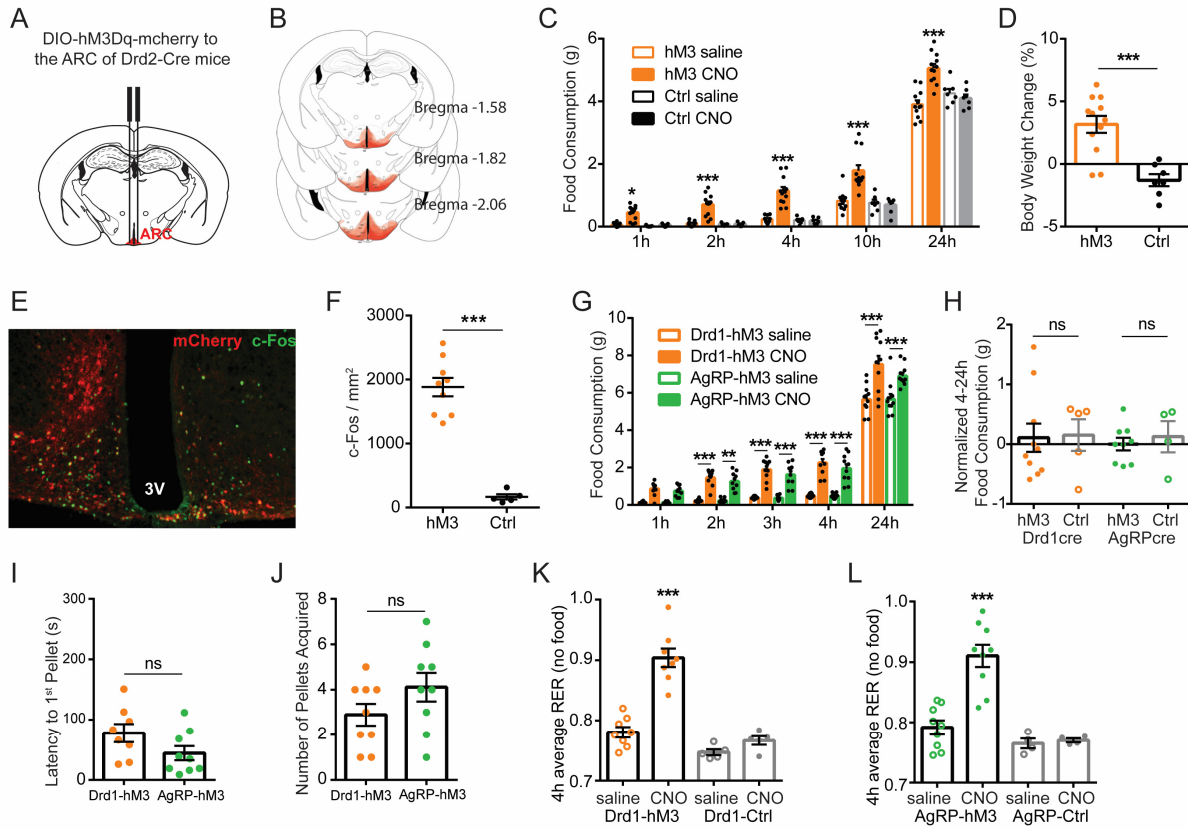

(A) Schematic depicting Cre-dependent hM3Dq-mCherry expression in the ARC of Drd1-Cre mice.

(B) Expression pattern of hM3Dq-mCherry in the brain sections of Drd1-hM3Dq mice.

(C) Food consumption in Drd1-hM3Dq (orange; hM3) or control (black; Ctrl) mice 1, 2, 3, 4, and 24 hrs after saline (hollow) or CNO (solid) administration. Repeated-measures three-way ANOVA with Bonferroni post hoc comparison;  $n = 7 - 12 / \text{group}$ ;  $F_{\text{transgene}} (1, 17) = 17.84, P < 0.001$ ;  $F_{\text{treatment}} (1, 17) = 37.31, P < 0.001$ ;  $F_{\text{time}} (2.504, 42.58) = 1120, P < 0.001$ .

(D) Percentage body weight change after 3 consecutive days of CNO injections in Drd1-hM3Dq mice Student's two-tailed  $t$ -test;  $n = 7 - 12 / \text{group}$ .

(E) Representative image of hM3Dq-mCherry and c-Fos expression after CNO administration in Drd1-hM3Dq mice. Scale bar represents 100  $\mu\text{m}$ .

(F) Number of c-Fos-expressing cells in the ARC after CNO administration in Drd1-hM3Dq or control mice. Student's two-tailed  $t$ -test;  $n = 5 - 9 / \text{group}$ .

(G) Food consumption in the Drd1-hM3Dq (orange) or AgRP-hM3Dq mice (green) 1, 2, 3, 4, and 24 hrs after saline (hollow) or CNO (solid) administration. Repeated-measures three-way ANOVA with Bonferroni post hoc comparison;  $n = 4 - 10 / \text{group}$ ;  $F_{\text{genotype}} (1, 18) = 1.172, P = 0.2932$ ;  $F_{\text{treatment}} (1, 18) = 120.8, P < 0.001$ ;  $F_{\text{time}} (4, 72) = 810.6, P < 0.001$ .

(H) Normalized food consumption from 4 hrs after injections until 24 hrs in Drd1-hM3Dq or control mice, or AgRP-hM3Dq or control mice. Responses were normalized by subtracting the average food consumption on day 1, 5, 6 after saline injections during the same period. Two-way ANOVA with Bonferroni post hoc comparison;  $n = 4 - 10 / \text{group}$ ;  $F_{\text{genotype}} (1, 24) = 0.08133, P = 0.7779$ ;  $F_{\text{transgene}} (1, 24) = 0.1268, P = 0.7249$ . One outlier in the AgRP-hM3Dq group was detected by ROUT outlier test ( $Q=1\%$ ) and excluded for analysis and data presentation.

(I) Latency to the acquisition of the first pellet. Student's two-tailed  $t$ -test;  $n = 8 - 9 / \text{group}$ . One outlier in the Drd1-hM3Dq group was detected by ROUT outlier test ( $Q=1\%$ ) and excluded for analysis and data presentation.

(J) Total numbers of food pellets acquired during the 20 min test. Student's two-tailed  $t$ -test;  $n = 9 / \text{group}$ .

(K) Average 4-hr RER in Drd1-hM3Dq and control mice following saline or CNO administration during food deprivation. Repeated-measures two-way ANOVA with Bonferroni post hoc comparison;  $n = 5 - 8 / \text{group}$ ;  $F_{\text{transgene}} (1, 11) = 41.20, P < 0.001$ ;  $F_{\text{treatment}} (1, 11) = 49.92, P < 0.001$ .

(L) Average 4-hr RER in AgRP-hM3Dq and control mice following saline or CNO administration during food deprivation. Repeated-measures two-way ANOVA with Bonferroni post hoc comparison;  $n = 4 - 9 / \text{group}$ ;  $F_{\text{transgene}} (1, 11) = 26.79, P < 0.001$ ;  $F_{\text{treatment}} (1, 11) = 12.20, P = 0.005$ .

Data are represented as mean  $\pm$  SEM. \* $P < 0.05$ ; \*\* $P < 0.01$ ; \*\*\* $P < 0.001$ ; ns, not significant.

Figure S3. Stimulation of ARC<sup>Drd1</sup> neurons expressing AgRP/NPY induces feeding acutely, Related to Figure 5

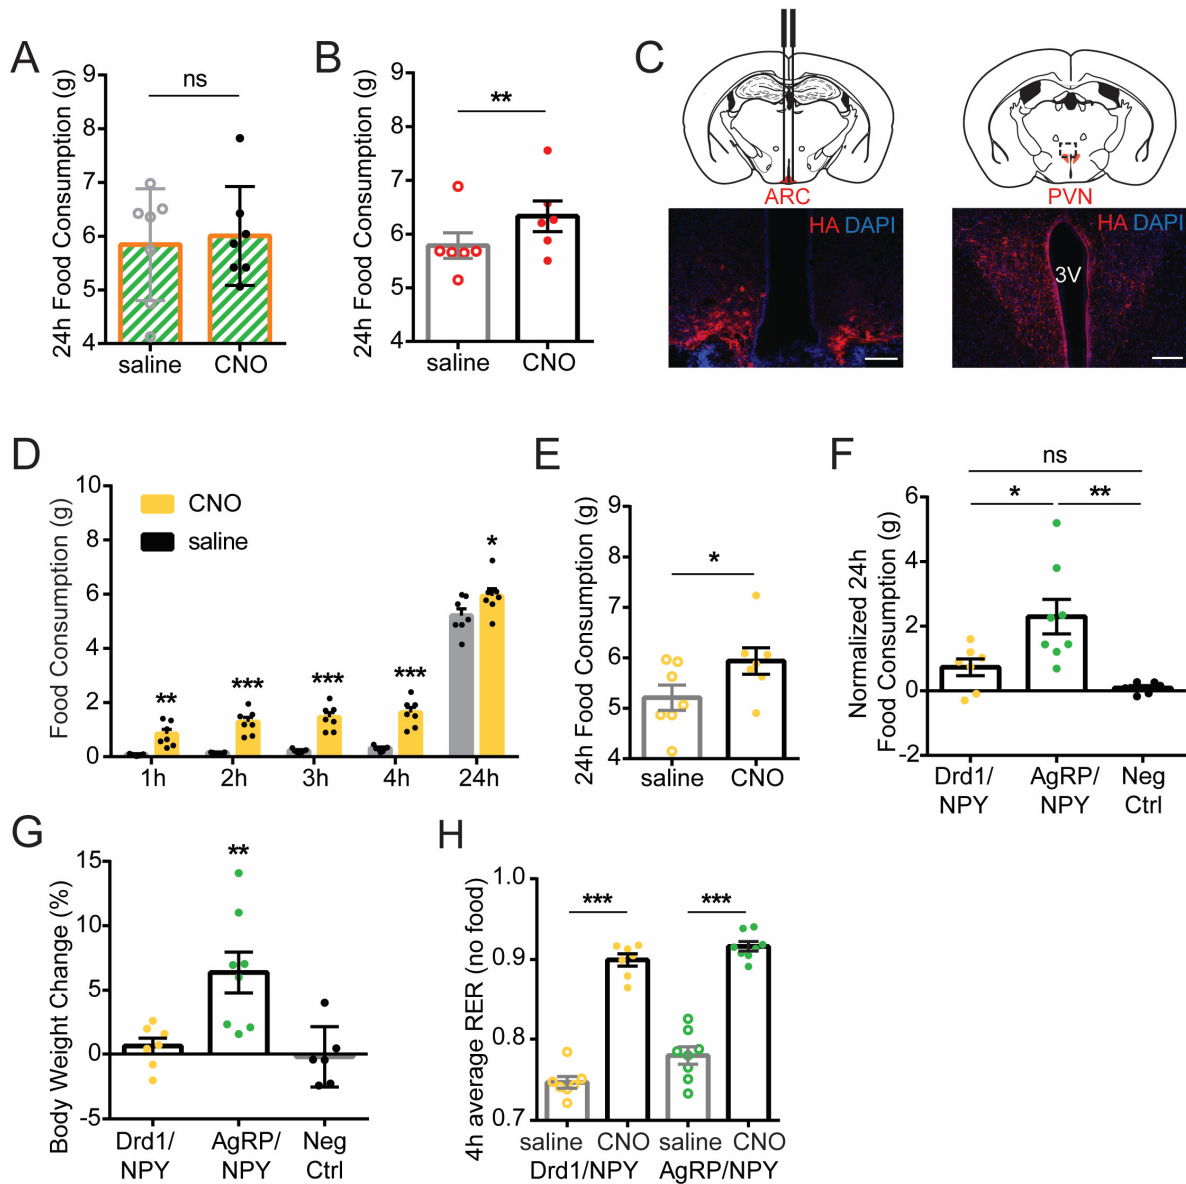

(A, B, E) 24-hr Food consumption following saline or CNO administration of Drd1-Cre;NPY-Flp mice with Cre-dependent hM3Dq-mCherry and Flp-dependent TeNT-GFP expression (A), Cre-on;Flp-off hM3Dq-HA expression (B), or Cre-on;Flp-on hM3Dq-HA expression (E) in the ARC. Student's two-tailed *t*-test; *n* = 6 - 7 / group.

(C) Schematic and representative image showing the Cre-on;Flp-on hM3Dq-HA expression in the ARC and PVN of Drd1-Cre;NPY-Flp mice. Scale bar represents 100  $\mu$ m.

(D) Food consumption after 1h, 2h, 3h, 4h, and 24 hrs of saline or CNO injections in Drd1/NPY-hM3Dq mice. Repeated-measures two-way ANOVA with Bonferroni post hoc

comparison;  $n = 7$  / group;  $F_{\text{treatment}} (1, 12) = 31.51, P < 0.001$ ;  $F_{\text{time}} (4, 84) = 847.8, P < 0.001$ .

(F) Normalized 24 -hr food consumption in *Drd1*/NPY-hM3Dq, *AgRP*/NPY-hM3Dq, or negative control mice. One-way ANOVA with Bonferroni post hoc comparison;  $n = 6 - 8$  / group;  $F_{\text{genotype}} (2, 18) = 8.844, P = 0.0021$ .

(G) Percentage body weight change in *Drd1*/NPY-hM3Dq, *AgRP*/NPY-hM3Dq, or negative control mice after 3 consecutive days of CNO injections. One-way ANOVA with Bonferroni post hoc comparison;  $n = 6 - 8$  / group;  $F_{\text{genotype}} (2, 18) = 9.278; P = 0.0017$ .

(H) Average 4-hr RER in *Drd1*/NPY-hM3Dq and *AgRP*/NPY-hM3Dq mice following saline or CNO administration during food deprivation. Repeated-measures two-way ANOVA with Bonferroni post hoc comparison;  $n = 7 - 8$  / group;  $F_{\text{genotype}} (1, 13) = 8.120, P = 0.0137$ ;  $F_{\text{treatment}} (1, 13) = 371.5, P < 0.001$ .

Data are represented as mean  $\pm$  SEM. \* $P < 0.05$ ; \*\* $P < 0.01$ ; \*\*\* $P < 0.001$ ; ns, not significant.

Figure S4. The ARC receives anatomical inputs from multiple dopaminergic neuronal populations, Related to Figure 6

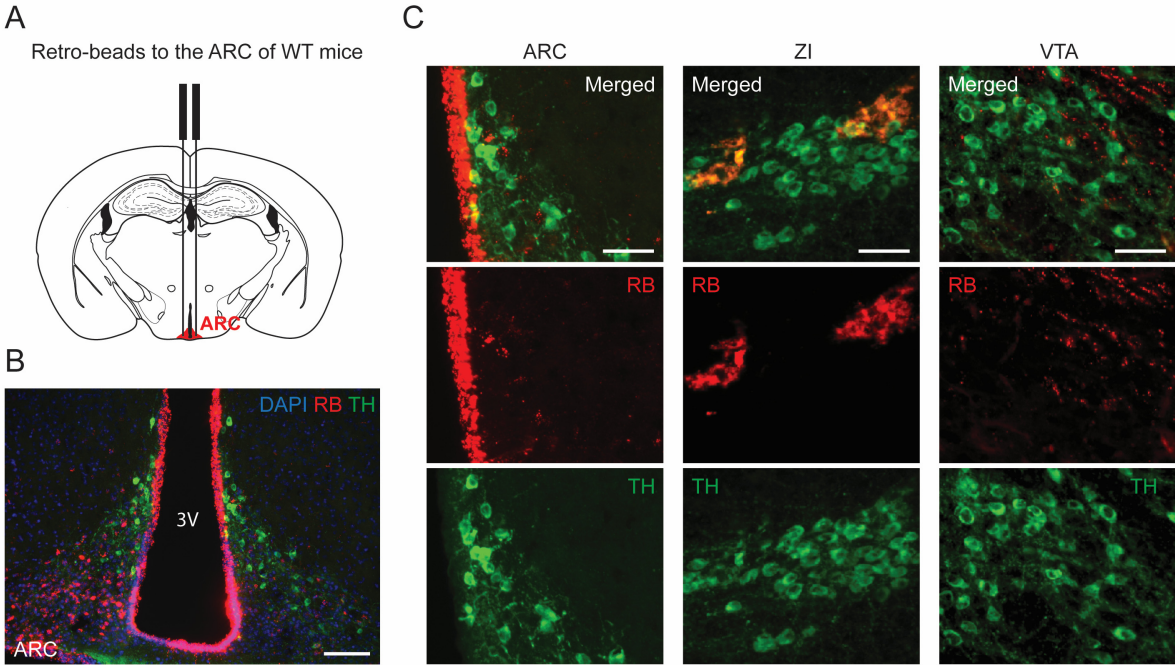

(A) ARC retrograde tracing paradigms depicting retro-beads delivered to the ARC of WT mice.  
(B) Representative images showing retro-beads in the ARC. Scale bar represents 100  $\mu\text{m}$ .  
(C) Representative images showing retro-beads and their co-localization with TH-expressing cells in the ARC (left), ZI (middle) and the VTA (right). Scale bar represents 50  $\mu\text{m}$ .

## Figure S5. DA levels in the ARC in response to food, Related to Figure 7

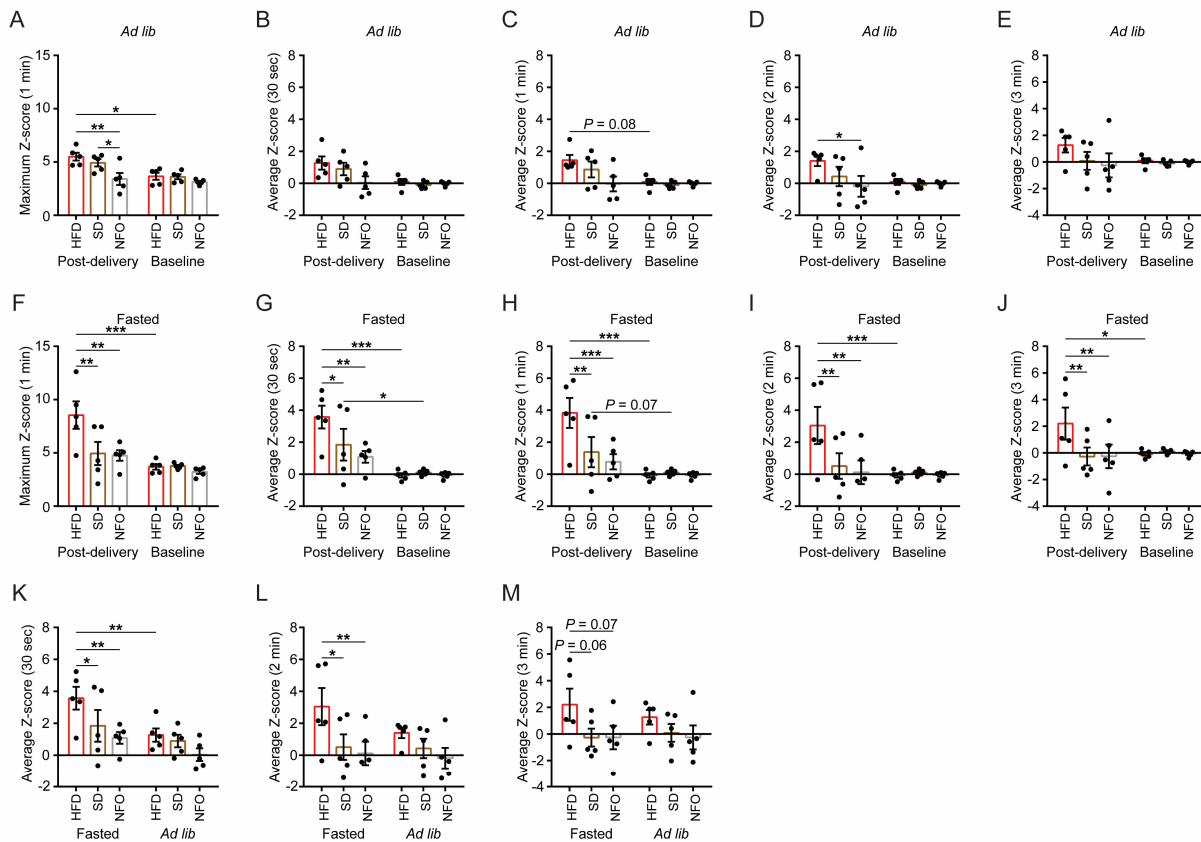

(A) Maximum Z-score during the baseline or the 1-min period following HFD (red), SD (brown), or NFO (gray) delivery in *ad lib* mice. Baseline is defined as the 90 - 30 sec window prior to food delivery (A-J). Repeated-measures two-way ANOVA with Bonferroni post hoc comparison;  $n = 5$  / group;  $F_{\text{time}} (1, 4) = 11.11$ ,  $P = 0.029$ ;  $F_{\text{treatment}} (2, 8) = 14.98$ ,  $P = 0.002$ .

(B) Average Z-score during the baseline or the 30-sec period following HFD (red), SD (brown), or NFO (gray) delivery in *ad lib* mice. Repeated-measures two-way ANOVA with Bonferroni post hoc comparison;  $n = 5$  / group;  $F_{\text{time}} (1, 4) = 12.67$ ,  $P = 0.0236$ ;  $F_{\text{treatment}} (2, 8) = 3.2$ ,  $P = 0.0953$ .

(C) Average Z-score during the baseline or the 1-min period following HFD (red), SD (brown), or NFO (gray) delivery in *ad lib* mice. Repeated-measures two-way ANOVA with Bonferroni post hoc comparison;  $n = 5$  / group;  $F_{\text{time}} (1, 4) = 9.282$ ,  $P = 0.0382$ ;  $F_{\text{treatment}} (2, 8) = 4.974$ ,  $P = 0.0395$ .

(D) Average Z-score during the baseline or the 2-min period following HFD (red), SD (brown), or NFO (gray) delivery in *ad lib* mice. Repeated-measures two-way ANOVA with Bonferroni post hoc comparison;  $n = 5$  / group;  $F_{\text{time}} (1, 4) = 2.383$ ,  $P = 0.1975$ ;  $F_{\text{treatment}} (2, 8) = 4$ ,  $P = 0.0625$ .



- (E) Average Z-score during the baseline or the 3-min period following HFD (red), SD (brown), or NFO (gray) delivery in *ad lib* mice. Repeated-measures two-way ANOVA with Bonferroni post hoc comparison;  $n = 5$  / group;  $F_{\text{time}} (1, 4) = 0.6314$ ,  $P = 0.4713$ ;  $F_{\text{treatment}} (2, 8) = 2.007$ ,  $P = 0.1967$ .
- (F) Maximum Z-score during the baseline or the 1-min period following HFD (red), SD (brown), or NFO (gray) delivery in overnight-fasted mice. Repeated-measures two-way ANOVA with Bonferroni post hoc comparison;  $n = 5$  / group;  $F_{\text{time}} (1, 4) = 9.699$ ,  $P = 0.0357$ ;  $F_{\text{treatment}} (2, 8) = 9.381$ ,  $P = 0.008$ .
- (G) Average Z-score during the baseline or the 30-sec period following HFD (red), SD (brown), or NFO (gray) delivery in overnight-fasted mice. Repeated-measures two-way ANOVA with Bonferroni post hoc comparison;  $n = 5$  / group;  $F_{\text{time}} (1, 4) = 12.58$ ,  $P = 0.0239$ ;  $F_{\text{treatment}} (2, 8) = 4.783$ ,  $P = 0.043$ .
- (H) Average Z-score during the baseline or the 1-min period following HFD (red), SD (brown), or NFO (gray) delivery in overnight-fasted mice. Repeated-measures two-way ANOVA with Bonferroni post hoc comparison;  $n = 5$  / group;  $F_{\text{time}} (1, 4) = 7.806$ ,  $P = 0.0491$ ;  $F_{\text{treatment}} (2, 8) = 8.483$ ,  $P = 0.0105$ .
- (I) Average Z-score during the baseline or the 2-min period following HFD (red), SD (brown), or NFO (gray) delivery in overnight-fasted mice. Repeated-measures two-way ANOVA with Bonferroni post hoc comparison;  $n = 5$  / group;  $F_{\text{time}} (1, 4) = 2.307$ ,  $P = 0.2034$ ;  $F_{\text{treatment}} (2, 8) = 7.759$ ,  $P = 0.0134$ .
- (J) Average Z-score during the baseline or the 3-min period following HFD (red), SD (brown), or NFO (gray) delivery in overnight-fasted mice. Repeated-measures two-way ANOVA with Bonferroni post hoc comparison;  $n = 5$  / group;  $F_{\text{time}} (1, 4) = 0.4723$ ,  $P = 0.5297$ ;  $F_{\text{treatment}} (2, 8) = 5.415$ ,  $P = 0.0326$ .
- (K) Average Z-score during the 30-sec period following HFD (red), SD (brown), or NFO (gray) delivery in overnight-fasted or *ad lib* mice. Repeated-measures two-way ANOVA with Bonferroni post hoc comparison;  $n = 5$  / group;  $F_{\text{condition}} (1, 4) = 11.96$ ,  $P = 0.0259$ ;  $F_{\text{treatment}} (2, 8) = 4.931$ ,  $P = 0.0402$ .
- (L) Average Z-score during the 2-min period following HFD (red), SD (brown), or NFO (gray) delivery in overnight-fasted or *ad lib* mice. Repeated-measures two-way ANOVA with Bonferroni post hoc comparison;  $n = 5$  / group;  $F_{\text{condition}} (1, 4) = 1.508$ ,  $P = 0.2868$ ;  $F_{\text{treatment}} (2, 8) = 10.91$ ,  $P = 0.0052$ .
- (M) Average Z-score during the 3-min period following HFD (red), SD (brown), or NFO (gray) delivery in overnight-fasted or *ad lib* mice. Repeated-measures two-way ANOVA with Bonferroni post hoc comparison;  $n = 5$  / group;  $F_{\text{condition}} (1, 4) = 0.1042$ ,  $P = 0.763$ ;  $F_{\text{treatment}} (2, 8) = 7.172$ ,  $P = 0.0164$ .

Data are represented as mean  $\pm$  SEM. \* $P < 0.05$ ; \*\* $P < 0.01$ ; \*\*\* $P < 0.001$ ; ns, not significant.

Figure S6. Feeding microstructures of mice with genetic ablation of *Drd1* in the ARC<sup>AgRP/NPY</sup> neurons, Related to Figure 7

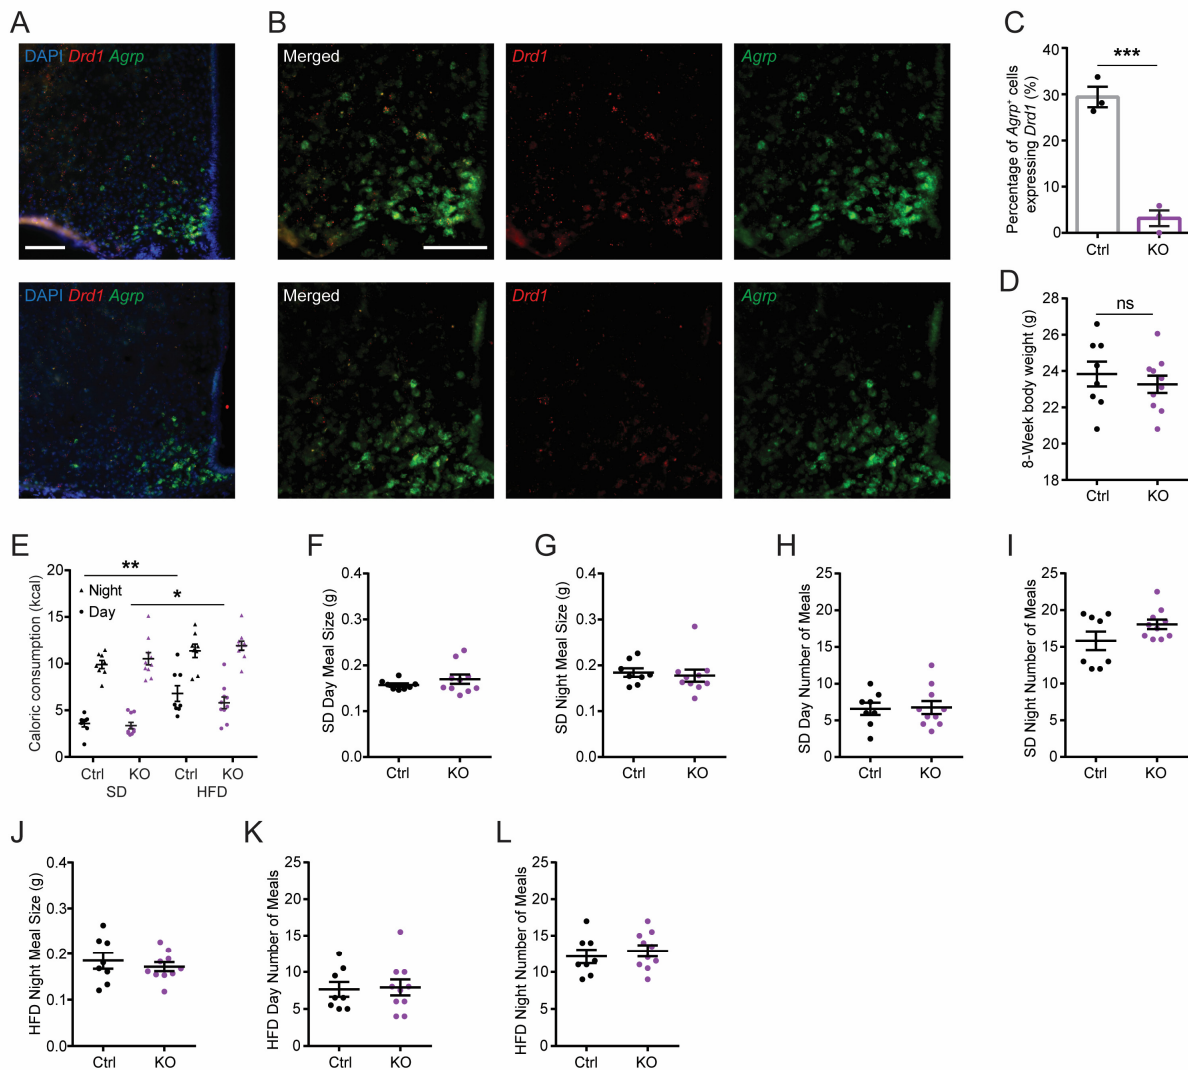

(A) Representative images of *Drd1* expression in control (Ctrl) (top) or *Drd1*<sup>AgRP-KO</sup> (KO) (bottom) mice. Scale bar represents 100  $\mu$ m.

(B) Zoomed-in images of A. Scale bar represents 100  $\mu$ m.

(C) Percentage of *AgRP*-expressing cells in Ctrl or KO mice with *Drd1* expression. Student's two-tailed *t*-test; *n* = 3 / group.

(D) Body weights of the control (Ctrl; *AgRP-Cre*<sup>+/+</sup>; *Drd1-Flox*<sup>fl/fl</sup>; black) and *Drd1*<sup>AgRP-KO</sup> (KO; *AgRP-Cre*<sup>cre/+</sup>; *Drd1-Flox*<sup>fl/fl</sup>; purple) littermates at 8 weeks of age. Student's two-tailed *t*-test; *n* = 8 - 10 / group.

(E) Day and night kilocalories (kcal) consumed by control or *Drd1*<sup>AgRP-KO</sup> mice during two days when provided with *ad lib* access to SD and the first two days when switched to *ad lib* access HFD. Repeated-measures three-way ANOVA with Bonferroni post hoc comparison;

$n = 8 - 10 / \text{group}$ ;  $F_{\text{time}} (1, 16) = 198.7, P < 0.001$ ;  $F_{\text{genotype}} (1, 16) = 0.0007562, P = 0.9784$ ;  $F_{\text{diet}} (1, 16) = 34.43, P < 0.001$ .

(F, G) Average of day-time (F) or night-time (G) SD meal sizes of Ctrl or KO mice during two days when provided with *ad lib* access to SD. Student's two-tailed *t*-test;  $n = 8 - 10 / \text{group}$ .

(H, I) Average of day-time (H) or night-time (I) number of SD meals of control or *Drd1*<sup>AgRP</sup>-KO mice during two days when provided with *ad lib* access to SD. Student's two-tailed *t*-test;  $n = 8 - 10 / \text{group}$ .

(J) Average of night-time HFD meal size of control or *Drd1*<sup>AgRP</sup>-KO mice during the first two days when switched to *ad lib* access HFD. Student's two-tailed *t*-test;  $n = 8 - 10 / \text{group}$ .

(K, L) Average of day-time (I) or night-time (J) number of HFD meals of control or *Drd1*<sup>AgRP</sup>-KO mice during the first two days when switched to *ad lib* access HFD. Student's two-tailed *t*-test;  $n = 8 - 10 / \text{group}$ .

Data are represented as mean  $\pm$  SEM. \* $P < 0.05$ ; \*\* $P < 0.01$ ; \*\*\* $P < 0.001$ ; ns, not significant.
